# Supplementary material for: Varietal Effect on Composition and Digestibility of Seedless Table Grapes (Vitis vinifera L.) under In Vitro Conditions
Source: MDPI journal article supplement (doi:10.3390/foods11243984), 2022-12-09
Supplement: s1 [file s1]

**Table S1.** Concentrations of all compounds found in seedless grape Adora at each stage of digestion.

| <i>Rt</i> | <i>Compound</i>                     | <i>Raw material (µg/g FW)</i> | <i>Digestion (µg/g FW)</i> |                      |                         |
|-----------|-------------------------------------|-------------------------------|----------------------------|----------------------|-------------------------|
|           |                                     |                               | <i>Oral phase</i>          | <i>Gastric phase</i> | <i>Intestinal phase</i> |
| 9.4       | Delphinidin-3-glucoside             | 3.35 ± 0.97                   | 1.80 ± 0.23                | 4.47 ± 0.82          | 2.12                    |
| 9.5       | Tryptophan                          | 64.91 ± 2                     | 74.71 ± 0.69               | 125.43 ± 11.07       | 19900.30 ± 3551.79      |
| 12.0      | Cyanidin-3-glucoside                | 6.37 ± 1.21                   | 2.8 ± 0.72                 | 9.42 ± 1.9           | 0.96                    |
| 13.6      | Catechin                            | 3.60 ± 0.06                   | 4.47 ± 0.66                | 4.57 ± 1.01          | 51.25 ± 5.39            |
| 14.0      | Peonidin-3-glucoside                | 4.71 ± 0.85                   | *                          | *                    | *                       |
| 14.7      | Malvidin-3-glucoside                | 54.2 ± 9.86                   | 34.78 ± 8.86               | 96.67 ± 13.35        | 26.26 ± 9.13            |
| 16.7      | Epicatechin                         | 6.70 ± 0.14                   | 3.96 ± 1.07                | 5.88 ± 0.74          | 22.93 ± 5.46            |
| 20.6      | Myricitin-3-glucoside               | 7.89 ± 1.47                   | 5.4 ± 0.93                 | 15.47 ± 4.27         | 8.04 ± 3.58             |
| 21.9      | Malvidin-3-(6-acetylglucoside)      | 4.75 ± 1.1                    | 1.5 ± 0.28                 | 5.75 ± 0.59          | 3.48 ± 0.34             |
| 23.5      | Delphindin-3-(6-coumaroylglucoside) | 1.97 ± 0.47                   | 1.2 ± 0.15                 | 2.08 ± 1.05          | *                       |
| 24.3      | Malvidin-3-(6-caffeoylglucoside)    | 2.31 ± 0.7                    | 1.07 ± 0.28                | 5.52 ± 4.04          | 1.30 ± 0.34             |
| 25.3      | Quercetin-3-glucoside               | 2.89 ± 0.87                   | 1.87 ± 0.41                | 3.30 ± 0.47          | *                       |
| 25.8      | Cyanidin-3-(6-coumaroylglucoside)   | 3.34 ± 0.95                   | 0.12 ± 0.17                | 1.87 ± 0.48          | 1.24                    |
| 26.0      | Quercetin-3-glucoronide             | 2.03 ± 0.89                   | 0.63 ± 0.89                | 2.49 ± 0.39          | *                       |
| 26.6      | Peonidin-3-(6-coumaroylglucoside)   | 21.62 ± 4.04                  | 3.22 ± 0.99                | 18.82 ± 5.6          | 1.56 ± 0.8              |
| 28.0      | Malvidin-3-(6-coumaroylglucoside)   | 64.25 ± 14.56                 | 4.16 ± 0.34                | 38.97 ± 2.73         | 3.24 ± 1.18             |

Data expressed as mean ± standard deviation. Concentrations expressed as micrograms of the compound per grames of fresh weight (FW); \* below the limit of quantification.

**Table S2.** Concentrations of all compounds found in seedless grape Autumn crisp.at each stage of digestion.

| <i>Rt</i> | <i>Compound</i>         | <i>Raw material (µg/g FW)</i> | <i>Digestion (µg/g FW)</i> |                      |                         |
|-----------|-------------------------|-------------------------------|----------------------------|----------------------|-------------------------|
|           |                         |                               | <i>Oral phase</i>          | <i>Gastric phase</i> | <i>Intestinal phase</i> |
| 5.8       | Gallic acid             | 0.38 ± 0.06                   | 1.09 ± 0.94                | 1.44 ± 0.59          | 5.65 ± 0.75             |
| 9.5       | Tryptophan              | 94.50 ± 15.26                 | 87.6 ± 29.21               | 89.15 ± 39.08        | 17996.7 ± 3061.68       |
| 12.5      | Procyanidin B1          | 1.37 ± 0.3                    | 0.45 ± 0.64                | 2.15 ± 0.01          | 33.07 ± 15              |
| 13.7      | Catechin                | 2.24 ± 0.18                   | 1.65 ± 0.02                | 1.96 ± 0.11          | 30.23 ± 25.58           |
| 16.7      | Epicatechin             | 1.6 ± 0.11                    | 1.54 ± 0.15                | 2.44 ± 0.59          | 16.96 ± 10.2            |
| 25.3      | Quercetin-3-glucoside   | 1.39 ± 0.17                   | 2.07 ± 1.89                | 3.85                 | 4.11                    |
| 25.9      | Quercetin-3-glucoronide | 2.66 ± 0.46                   | 1.32 ± 0.7                 | 2.98                 | *                       |

Data expressed as mean ± standard deviation. Concentrations expressed as micrograms of the compound per grames of fresh weight (FW); \* below the limit of quantification.

**Table S3.** Concentrations of all compounds found in seedless grape Pristine at each stage of digestion.

| <i>Rt</i> | <i>Compound</i>          | <i>Raw material (µg/g FM)</i> | <i>Digestion (µg/g FW)</i> |                      |                         |
|-----------|--------------------------|-------------------------------|----------------------------|----------------------|-------------------------|
|           |                          |                               | <i>Oral phase</i>          | <i>Gastric phase</i> | <i>Intestinal phase</i> |
| 5.7       | Gallic acid              | 1.06 ± 0.89                   | 0.32 ± 0.1                 | 1.3 ± 2.1            | 5.45 ± 2.6              |
| 8.7       | Gallocatechin            | 2.28 ± 0.48                   | 0.96 ± 1.36                | *                    | 3.23 ± 1.57             |
| 9.3       | Tryptophan               | 16.86 ± 1.31                  | 21.35 ± 0.92               | 36.08 ± 26.1         | 13979.26 ± 9844.1       |
| 12.5      | Procyanidin B1           | 3.66 ± 1.01                   | 0.4 ± 0.57                 | 1.18 ± 1.66          | 17.62 ± 7.31            |
| 13.5      | Catechin                 | 4.63 ± 0.6                    | 2.14 ± 0.08                | 2.08 ± 1.81          | 11.86 ± 6.31            |
| 15.4      | Epigallocatechin gallate | 2.56 ± 1.58                   | 1.19 ± 0.22                | 2.21 ± 0.9           | 3.31 ± 2.1              |
| 16.7      | Epicatechin              | 3.19 ± 0.45                   | 2.91 ± 0.34                | 3.29 ± 1.35          | 6.68 ± 3.59             |
| 25.3      | Quercetin-3-glucoside    | 1.74 ± 0.08                   | 4.29 ± 4.49                | 6.87                 | 2.13                    |
| 25.9      | Quercetin-3-glucoronide  | 2.36 ± 0.79                   | 1.98 ± 1.03                | 2.03                 | 3.01                    |

Data expressed as mean ± standard deviation. Concentrations expressed as micrograms of the compound per grames of fresh weight (FW); \* below the limit of quantification.

**Table S4.** Concentrations of all compounds found in seedless grape Scarlotta at each stage of digestion.

| <i>Rt</i> | <i>Compound</i>                    | <i>Raw material (µg/g FW)</i> | <i>Digestion (µg/g FW)</i> |                      |                         |
|-----------|------------------------------------|-------------------------------|----------------------------|----------------------|-------------------------|
|           |                                    |                               | <i>Oral phase</i>          | <i>Gastric phase</i> | <i>Intestinal phase</i> |
| 5.8       | Gallic acid                        | 0.76 ± 0.24                   | 0.37                       | 0.69 ± 0.09          | 4.49 ± 2.65             |
| 9.3       | Delphinidin-3-glucoside            | 0.68 ± 0.17                   | 0.43                       | *                    | *                       |
| 9.7       | Tryptophan                         | 47.86 ± 9.4                   | 54.63 ± 38.72              | 86.21 ± 4.36         | 17454.84 ± 4284.19      |
| 11.4      | Cyanidina-3-glucoside              | 1.46 ± 2.67                   | 1.13                       | 2.61 ± 0.85          | 0.5                     |
| 13.5      | Catechin                           | 12.93 ± 4.92                  | 2.28 ± 0.72                | 2.62 ± 0.26          | 32.68 ± 2.41            |
| 13.9      | Peonidin-3-glucoside               | 21.25 ± 10.39                 | 25.49 ± 12.45              | 52.31 ± 7.72         | 7.39 ± 3                |
| 14.5      | Malvidin-3-glucoside               | 12.47 ± 6.09                  | *                          | *                    | *                       |
| 24.7      | Malvidin-3-caffeoylglucoside       | 0.49 ± 0.28                   | 0.49 ± 0.23                | 1.26 ± 0.89          | 0.37                    |
| 25.0      | quercetina-3-glucoside             | 13.68 ± 1.39                  | 1.7 ± 0.61                 | 2.58 ± 0.78          | 3.38 ± 0.12             |
| 25.7      | quercetina-3-glucoronide           | 35.68 ± 1.22                  | 1.57 ± 0.67                | 2.55 ± 0.82          | 2.80 ± 1.22             |
| 26.0      | Peonidin-3-(6- coumaroylglucoside) | 1.46 ± 0.68                   | 1.13 ± 0.66                | 2.61 ± 2.8           | 0.5 ± 0.22              |
| 27.5      | Malvidin-3-(6- coumaroylglucoside) | 3.92 ± 2.23                   | 1.65 ± 1.28                | 4.52 ± 4.05          | 0.49 ± 0.23             |

Data expressed as mean ± standard deviation. Concentrations expressed as micrograms of the compound per grames of fresh weight (FW); \* below the limit of quantification.

**Table S5.** Concentrations of all compounds found in seedless grape Crimson at each stage of digestion.

| <i>Rt</i> | <i>Compound</i>                    | <i>Raw material (µg/g FW)</i> | <i>Digestion (µg/g FW)</i> |                      |                         |
|-----------|------------------------------------|-------------------------------|----------------------------|----------------------|-------------------------|
|           |                                    |                               | <i>Oral phase</i>          | <i>Gastric phase</i> | <i>Intestinal phase</i> |
| 5.7       | Gallic acid                        | 1.17 ± 0.38                   | 1.72 ± 1.16                | 1.23                 | 4.73 ± 0.15             |
| 9.7       | Tryptophan                         | 338.76 ± 28.03                | 563.25 ± 186.93            | 413.41 ± 21.57       | 18474.78 ± 3090.21      |
| 11.9      | Cyanidina-3-glucoside              | 3.07 ± 0.56                   | *                          | *                    | *                       |
| 13.8      | Catechin                           | 4.17 ± 0.46                   | 2.01 ± 0.27                | 3.14 ± 0.53          | 28.73 ± 2.56            |
| 14.0      | Peonidin-3-glucoside               | 33.88 ± 15.59                 | 35.16 ± 27.37              | 34.23 ± 9.28         | 32.79 ± 37.83           |
| 14.7      | Malvidin-3-glucoside               | 11.86 ± 5.62                  | *                          | *                    | *                       |
| 15.9      | Epigallocatechin gallate           | 2.7 ± 0.38                    | 1.42 ± 0.67                | *                    | 5.17 ± 0.44             |
| 16.9      | Epicatechin                        | 3.93 ± 0.12                   | 2.4 ± 0.68                 | 2.57 ± 0.17          | 13.59 ± 9.45            |
| 25.6      | Quercetina-3-glucoside             | 3.4 ± 0.49                    | 3.25 ± 1.36                | 3.44 ± 0.74          | 3.43 ± 1.71             |
| 26.0      | Quercitina-3-glucoronide           | 1.09 ± 0.14                   | 2.05                       | 1.59 ± 0.61          | 1.94                    |
| 27.0      | Peonidin-3-(6- coumaroylglucoside) | 1.08 ± 0.41                   | 0.74                       | 0.66                 | *                       |
| 28.4      | Malvidin-3-(6- coumaroylglucoside) | 5.47 ± 2.47                   | 0.69 ± 0.42                | 1.38 ± 0.03          | 0.91                    |

Data expressed as mean ± standard desviation. Concentration expressed as micrograms of the compound per grames of fresh weight (FW); \* belloe the limit of quantification.

**Table S6.** Concentrations of all compounds found in seedless grape Melody at each stage of digestion.

| <i>Rt</i> | <i>Compound</i>                   | <i>Raw material (µg/g FW)</i> | <i>Digestion (µg/g FW)</i> |                      |                         |
|-----------|-----------------------------------|-------------------------------|----------------------------|----------------------|-------------------------|
|           |                                   |                               | <i>Oral phase</i>          | <i>Gastric phase</i> | <i>Intestinal phase</i> |
| 5.7       | Gallic acid                       | 0.72 ± 0.1                    | 0.76 ± 0.07                | 0.92                 | 4.35 ± 1.33             |
| 9.5       | Delphinidin-3-glucoside           | 11.37 ± 4.73                  | 3.79                       | 6.39 ± 4.08          | 0.74                    |
| 9.7       | Tryptophan                        | 91.02 ± 36.15                 | 76.87 ± 52.23              | 105.29 ± 35.48       | 20927.85 ± 3534.92      |
| 12.1      | Cyanidin-3-glucoside              | 15.85 ± 6.14                  | 3.5 ± 4.36                 | 11.19 ± 9.63         | 0.88                    |
| 12.5      | Procyanidin B1                    | 5.01 ± 1.64                   | *                          | 11.76                | *                       |
| 13.5      | Catechin                          | 10.75 ± 4.01                  | 5.27 ± 2.49                | 9.69 ± 2.97          | 11.75 ± 3.83            |
| 14.0      | Peonidin-3-glucoside              | 12.18 ± 3.79                  | *                          | *                    | *                       |
| 14.5      | Malvidin-3-glucoside              | 231.44 ± 55.78                | 51.75 ± 27.9               | 135.82 ± 55.78       | 26.73 ± 6.82            |
| 16.7      | Epicatechin                       | 7.16 ± 1.55                   | 5.18 ± 1.2                 | 6.44 ± 0.74          | 15.85 ± 2.89            |
| 20.5      | Myricetin-3-glucoside             | 30.23 ± 9.12                  | 5.24 ± 1.86                | 12.84 ± 7            | 6.5 ± 0.16              |
| 21.9      | Malvidin-3-acetylglucoside        | 8.92 ± 1.63                   | 1.83                       | 5.02 ± 0.62          | 0.55 ± 0.45             |
| 24.3      | Malvidin-3-caffeoylglucoside      | 1.41 ± 0.27                   | 1.31 ± 1.3                 | 2.02 ± 0.23          | 0.51 ± 0.47             |
| 25.3      | Quercetin-3-glucoside             | 4.75 ± 1.95                   | 2.75 ± 0.29                | 3.48 ± 0.34          | 5.93 ± 1.17             |
| 25.6      | Quercetin-3-glucuronide           | 4.69 ± 2.54                   | 1.96 ± 0.49                | 3.24                 | 5.44                    |
| 26.6      | Peonidin-3-(6-coumaroylglucoside) | 23.81 ± 3.11                  | 1.56 ± 0.94                | 6.77 ± 0.34          | 0.5 ± 0.46              |
| 27.8      | Malvidin-3-coumaroylglucoside     | 58.36 ± 14.99                 | 2.32 ± 0.68                | 6.25 ± 6.92          | 0.58                    |
| 29.0      | Kaempherol-3-glucoside            | 1.56 ± 0.29                   | *                          | 4.85                 | *                       |

Data expressed as mean ± standard deviation. Concentration expressed as micrograms of the compound per grams of fresh weight (FW); \* below the limit of quantification.
